# Supplementary material for: Enhanced biosensing of tumor necrosis factor-alpha based on aptamer-functionalized surface plasmon resonance substrate and Goos–Hänchen shift
Source: Royal Society of Chemistry journal article supplement (doi:10.1039/d4an00194j), 2024-01-01
Supplement: d4an00194j1.pdf [file d4an00194j1.pdf]

## Enhanced biosensing of tumor necrosis factor-alpha based on aptamer-functionalized surface plasmon resonance substrate and Goos-Hänchen shift

Kathrine Nygaard Borg<sup>a,b</sup>, Rodolphe Jaffiol<sup>b</sup>, Yi-Ping Ho<sup>a,d,e,f,\*</sup>, and Shuwen Zeng<sup>b,\*,†</sup>

<sup>a</sup>*Department of Biomedical Engineering, The Chinese University of Hong Kong, Shatin, Hong Kong SAR, China.*

<sup>b</sup>*Light, Nanomaterials & Nanotechnologies (L2n), CNRS-UMR 7076, University of Technology of Troyes, 10000, Troyes, France.*

<sup>c</sup>*Centre for Biomaterials, The Chinese University of Hong Kong, Hong Kong SAR, China.*

<sup>d</sup>*Hong Kong Branch of CAS Center for Excellence in Animal Evolution and Genetics, Hong Kong SAR, China.*

<sup>e</sup>*State Key Laboratory of Marine Pollution, City University of Hong Kong, Hong Kong SAR, China.*

† Submitting author. \* Corresponding authors ([ypho@cuhk.edu.hk](mailto:ypho@cuhk.edu.hk), [shuwen.zeng@cns.fr](mailto:shuwen.zeng@cns.fr)).

## Supplementary Figures

Fig. S1 Validation of binding between BSA and aptamer by isothermal titration calorimetry.

Fig. S2 Sensorgrams of GH-aptasensing of BSA.

Fig. S3 Sensorgrams of GH-aptasensing of TNF- $\alpha$ .

Fig. S4 Sensorgrams of TNF- $\alpha$  immunosensing using the GH setup.

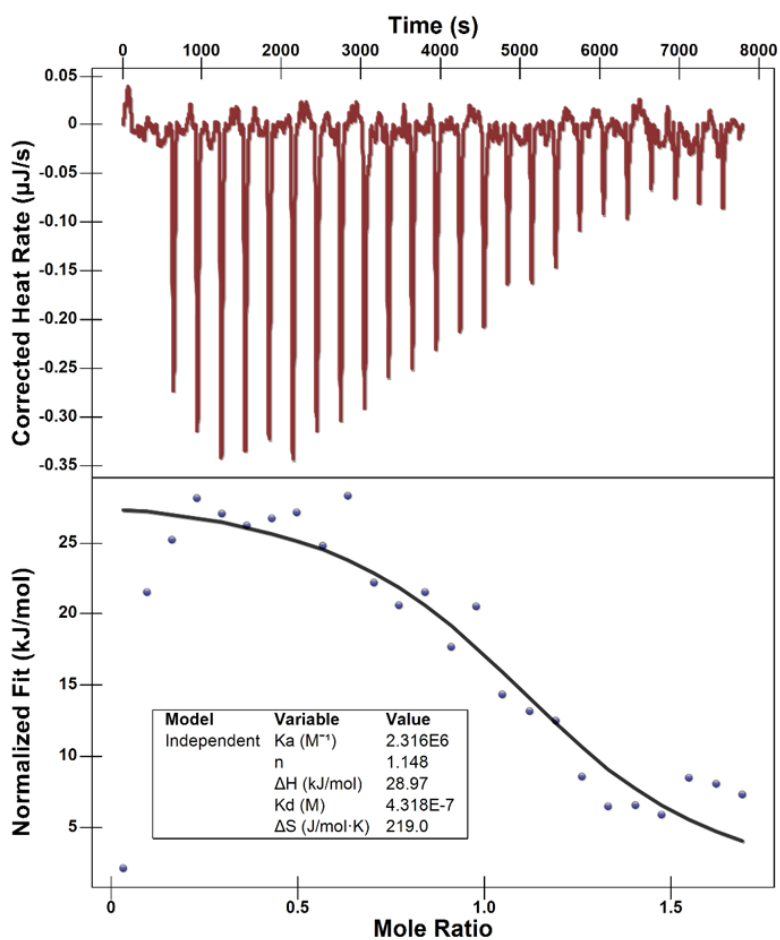

**Fig. S1** Validation of binding between BSA and aptamer by isothermal titration calorimetry. Representative ITC data for BSA-specific aptamer (6.5  $\mu M$ ) and BSA (100  $\mu M$ ) at 25  $^{\circ}C$ . Top panel: the raw baseline-smoothed ITC data plotted as heat flow versus time, and the bottom panel shows the integrated and concentration-normalized heat for each injection versus the BSA-specific aptamer molar ratio with a nonlinear analysis of the data with the independent binding model gives the best-fit values.

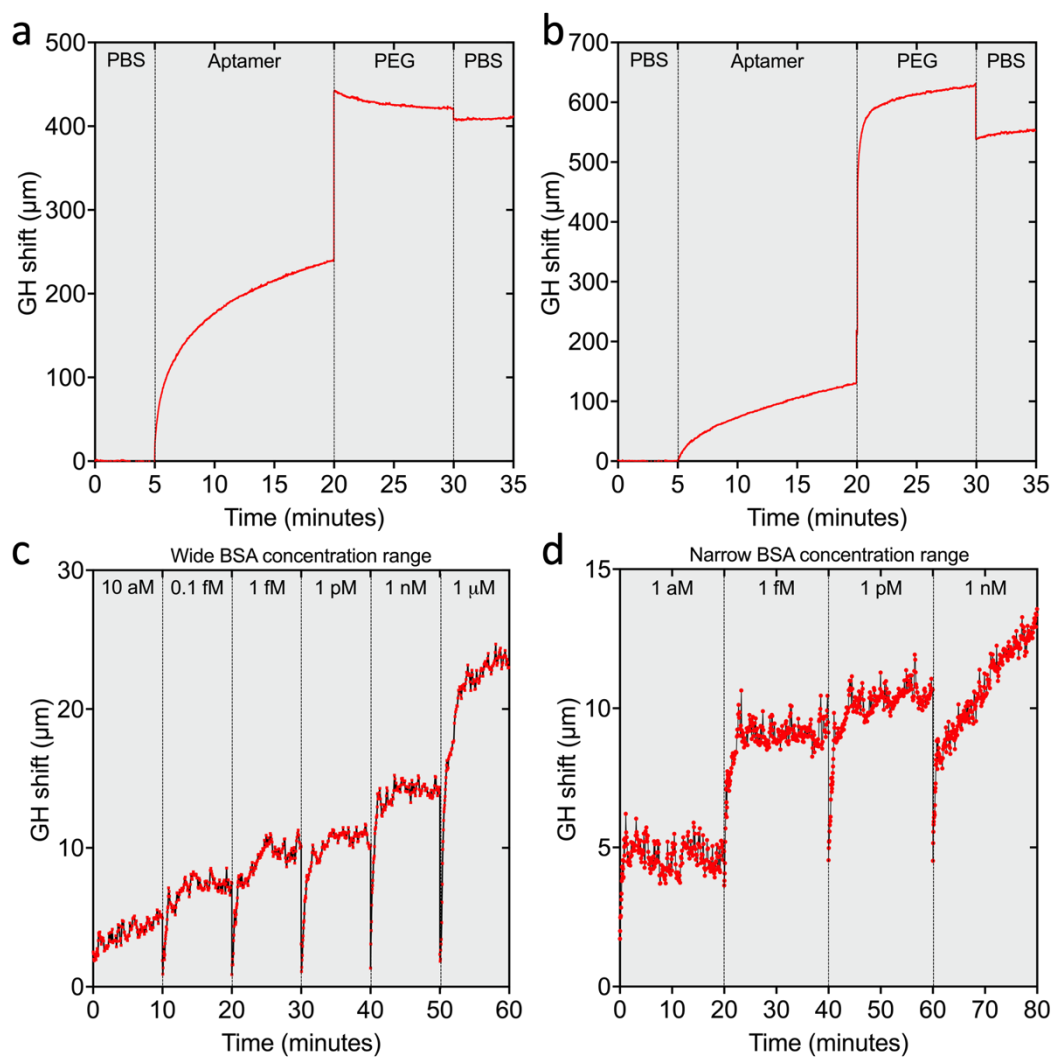

**Fig. S2** Sensorgrams of aptamer-based GH-sensing of BSA. BSA-specific aptamer functionalization and blocking with thiol-PEG molecules for sensing of (a) 10 aM to 1  $\mu\text{M}$  BSA concentrations and (b) 1 aM to 1 nM BSA. (c) Time-course of sequential injection of titrated BSA solutions from 10 aM to 1  $\mu\text{M}$  (excluding intermediate running buffer washes). The data points within the 0-1 minute range are based on the average of 50 measurements, while the rest are derived from the average of 100 measurements. (d) Time-course of serial-diluted BSA injections from 1 aM to 1 nM (excluding intermediate running buffer washes). Averages for data points within the 0-1 minute timeframe are based on 50 measurements, while those beyond 1 minute are derived from an average of 100 measurements.

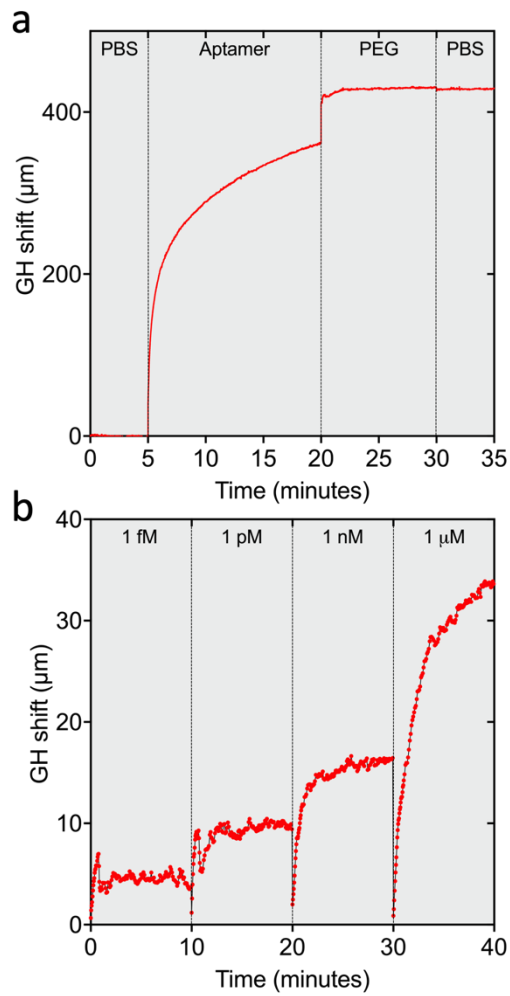

**Fig. S3** Sensorgrams of aptamer-based GH-sensing of TNF- $\alpha$ . **(a)** TNF- $\alpha$ -specific aptamer functionalization and PEG-blocking. **(b)** Sequential GH-aptasensing of various TNF- $\alpha$  concentrations (1 fM, 1 pM, 1 nM, and 1  $\mu$ M). The data points in the 0-1 minute range are averages from 50 measurements, whereas the remaining points are averages from 100 measurements.

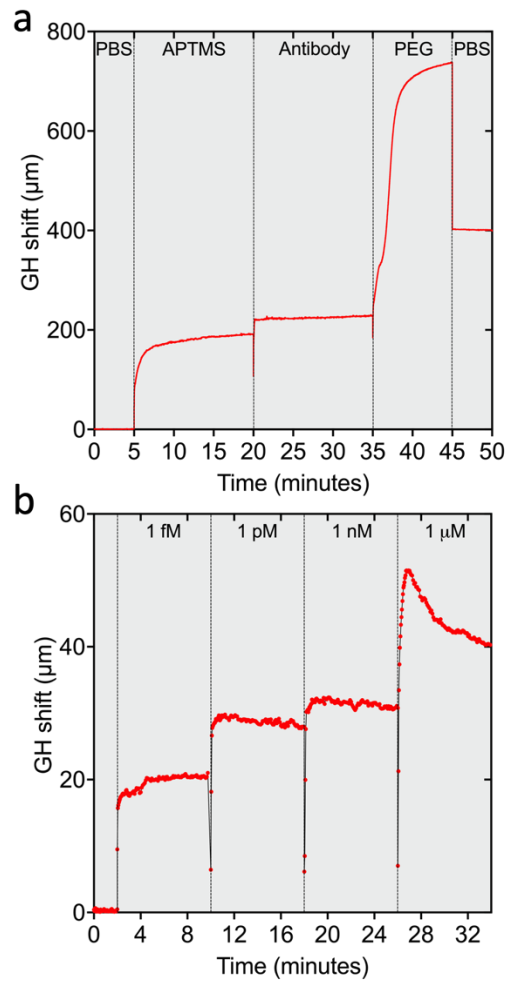

**Fig. S4** Sensorgrams of TNF- $\alpha$  GH-immunosensing. **(a)** Antibody-functionalization and PEG-blocking of the Au-sensing surface. **(b)** Sequential injections of TNF- $\alpha$  and binding to antibody on Au surface after establishing the running buffer baseline. Data are depicted as averages in **(b)**; for data points in the 0-1 minute segment, they are calculated from 50 measurements, while for the remaining data points they are derived from 100 measurements.
